# Supplementary material for: Injectable pH Thermo-Responsive Hydrogel Scaffold for Tumoricidal Neural Stem Cell Therapy for Glioblastoma Multiforme
Source: MDPI journal article supplement (doi:10.3390/pharmaceutics14102243), 2022-10-20
Supplement: s1 [file s1]

Article

# Injectable pH Thermo-Responsive Hydrogel Scaffold for Tumoricidal Neural Stem Cell Therapy for Glioblastoma Multiforme

Jasmine L. King <sup>1</sup>, Panita Maturavongsadit <sup>2</sup>, Shawn D. Hingtgen <sup>1</sup> and S. Rahima Benhabbour <sup>1,2,\*</sup>

<sup>1</sup> Division of Pharmacoengineering and Molecular Pharmaceutics, Eshelman School of Pharmacy,

University of North Carolina, Chapel Hill, NC 27599, USA

<sup>2</sup> Joint Department of Biomedical Engineering, University of North Carolina and North Carolina State University,

Chapel Hill, NC 27599, USA

\* Correspondence: benhabbs@email.unc.edu

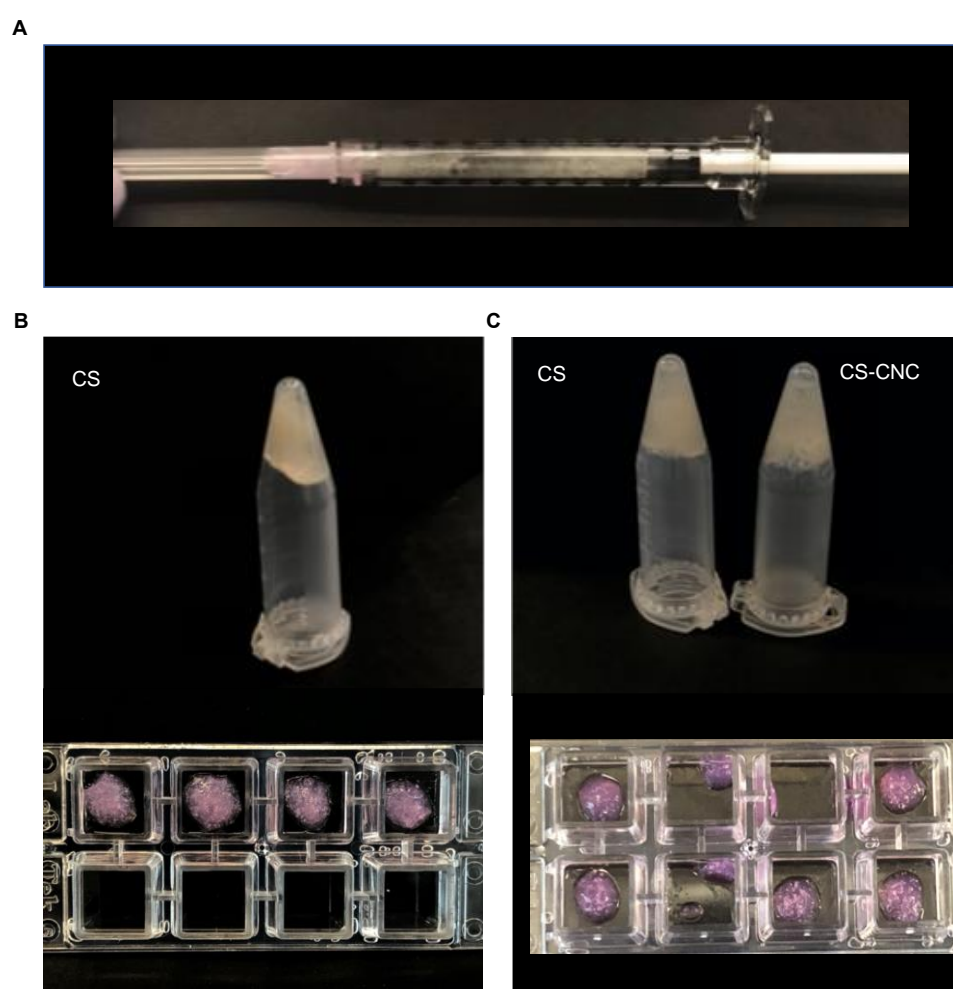

**Figure S1. Non-homogeneity of NSCs in hydrogels.** A) Non-homogenous distribution of  $2.5 \times 10^6$  NSCs in CS pre-hydrogel syringe. B) NSC ( $2.5 \times 10^7$ /mL hydrogel) clumping within the CS hydrogels post gelation and 24 h following incubation. C) NSC ( $5 \times 10^7$ /mL hydrogel) clumping within the CS and CS-CNC hydrogels post gelation and 24 h following incubation ( $n=4$ ; 200  $\mu$ L samples).

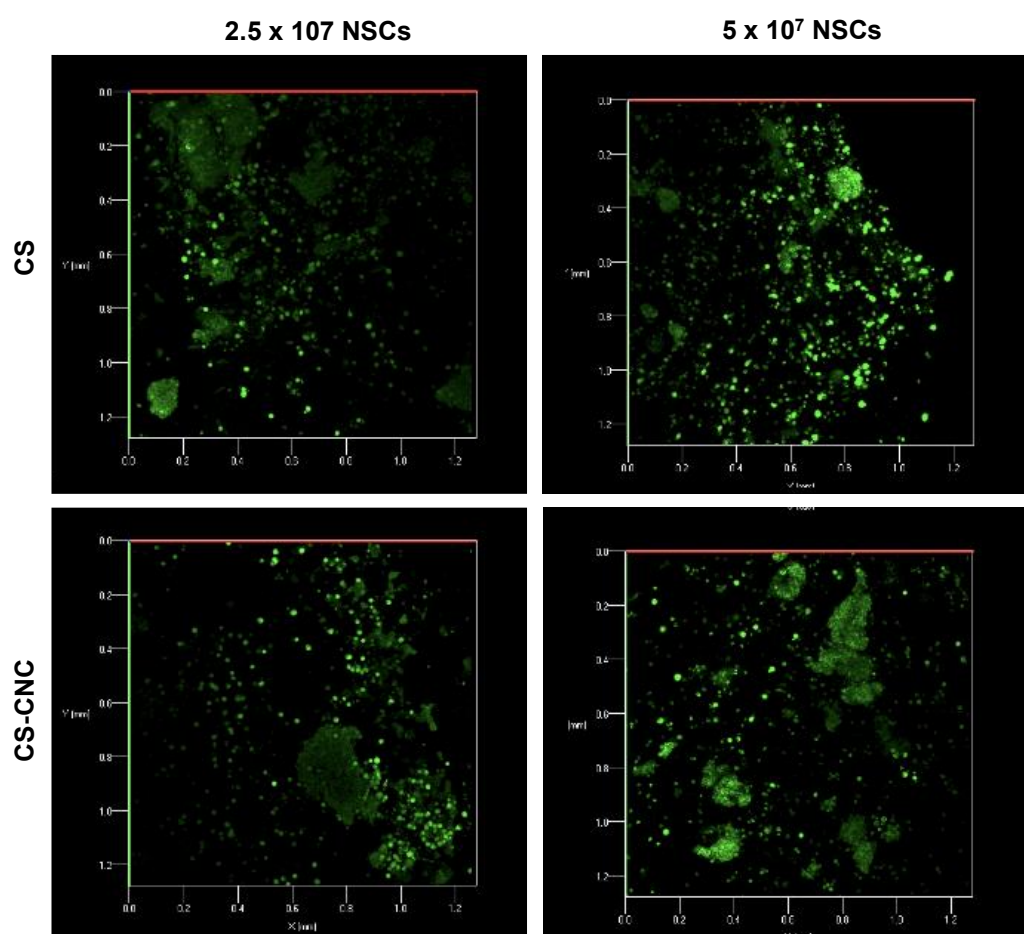

**Figure S2.** In vitro cell viability within hydrogel matrices. Confocal fluorescent images of NSC-hydrogels (2.5x10<sup>7</sup> and 5x10<sup>7</sup> NSCs/mL hydrogel) showing non-homogeneity and cell-biomaterial clumping post 24 h incubation (n=4; 200 μL samples).

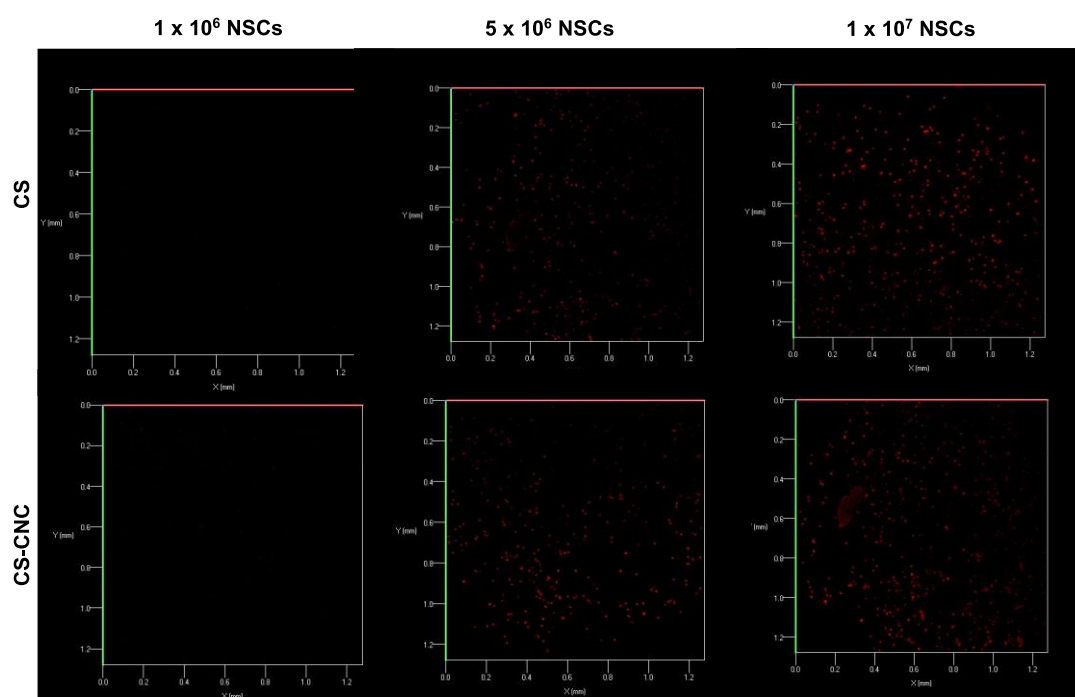

**Figure S3. In vitro cell viability within hydrogel matrices.** Confocal fluorescent images of NSC-hydrogels ( $10^6$  -  $10^7$  NSCs/mL hydrogel) showing dead cells within the hydrogel matrix post 24 h incubation (n=3; 200  $\mu$ L samples).
